# Supplementary material for: Disruption of maternal IgA by prenatal antibiotics precedes intestinal E. coli colonization and late-onset sepsis in neonates
Source: bioRxiv or medRxiv preprint supplement (doi:10.1101/2023.09.04.23295031), 2024-01-05
Supplement: Supplementary file [file media-1.pdf]

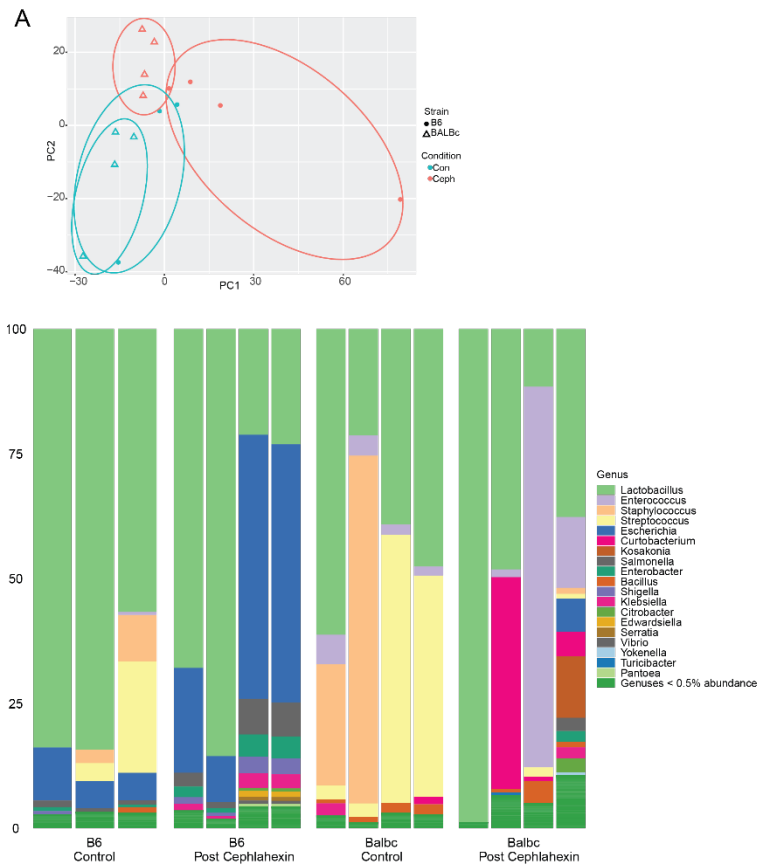

Supplementary Figure 2: A) Principal component analysis of 16S sequencing revealed similar microbiota composition of control pups (blue=control; closed circles=C57BL/6, open triangles = BALB/C), but differing effects of cephalixin (pink=cephalexin). B) Stacked bar plots of relative abundance of genus taxa in B/6 and BALB/c pup stool. N=3 independent litters per group.
