# Supplementary material for: Disruption of maternal IgA by prenatal antibiotics precedes intestinal E. coli colonization and late-onset sepsis in neonates
Source: bioRxiv or medRxiv preprint supplement (doi:10.1101/2023.09.04.23295031), 2024-01-05
Supplement: Supplementary file [file media-2.pdf]

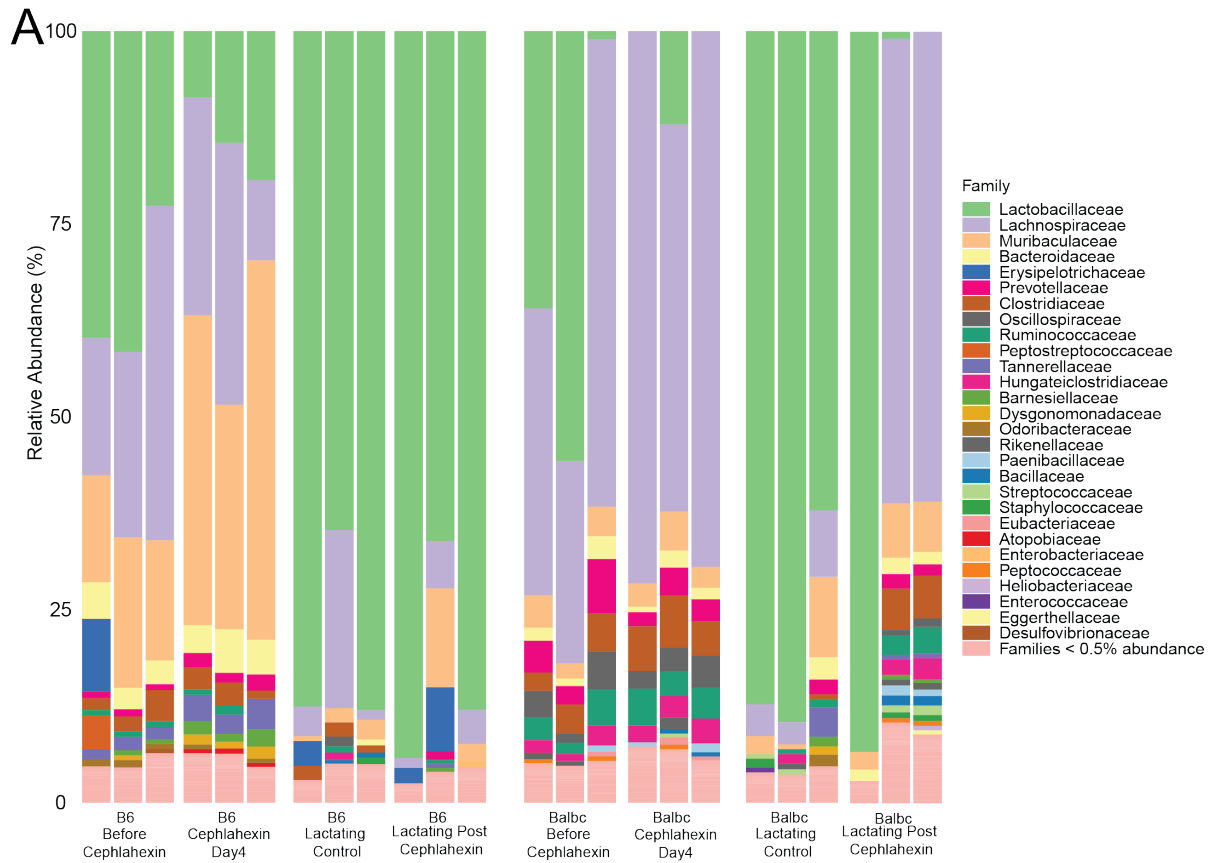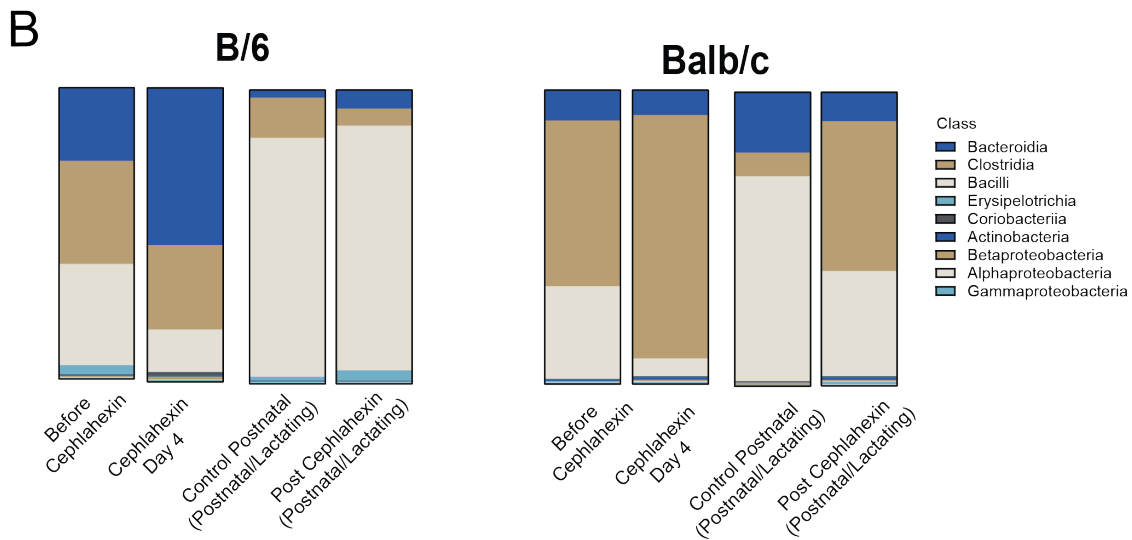

Supplementary Figure 3: A) Stacked bar plots of relative abundance of families in B/6 and BALB/c dam stool. B) Stacked bar plots of pooled relative abundance of classes in B/6 and BALB/c dam stool.
