# Supplementary material for: Disruption of maternal IgA by prenatal antibiotics precedes intestinal E. coli colonization and late-onset sepsis in neonates
Source: bioRxiv or medRxiv preprint supplement (doi:10.1101/2023.09.04.23295031), 2024-01-05
Supplement: Supplementary file [file media-3.pdf]

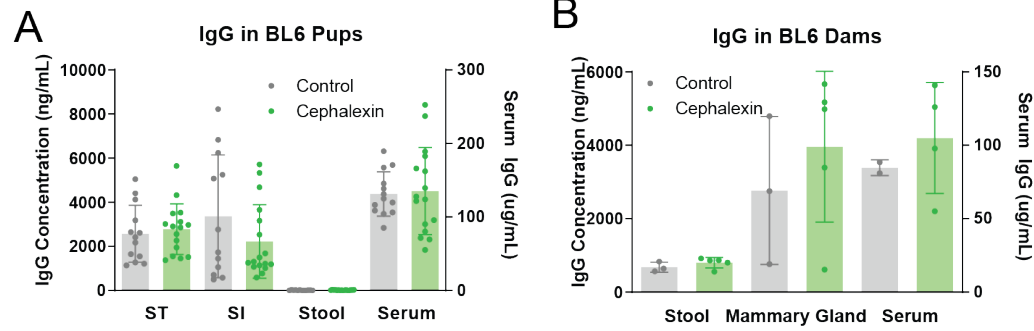

Supplementary Figure 1: Total IgG, and IgA+ bacteria following cephalixin treatment.

Cephalexin was administered to pregnant dams in drinking water from ED 14 to ED21, tissue was analyzed on PND7. A) Total IgG was measured from stomach contents (ST), small intestinal contents (SI), stool, and serum of pups. B) Total IgG was measured from stool, mammary glands, and serum of dams. N=3 independent litters per group.
