# Supplementary material for: Disruption of maternal IgA by prenatal antibiotics precedes intestinal E. coli colonization and late-onset sepsis in neonates
Source: bioRxiv or medRxiv preprint supplement (doi:10.1101/2023.09.04.23295031), 2024-01-05
Supplement: Supplementary file [file media-4.pdf]

|                             | Traditional | Nontraditional |
|-----------------------------|-------------|----------------|
| Days antibiotics were given | 3.97        | 3.72           |
| Cephalosporin use           | 0           | 20             |
| Gentamicin use              | 0           | 19             |
| Vancomycin use              | 0           | 4              |
| Clindamycin use             | 0           | 21             |
| No azithromycin             | 12          | 2              |

Supplementary Table 1: Antibiotic use within traditional and nontraditional antibiotic regimens
